# Supplementary material for: Prevalence and distribution of Plasmodium vivax Duffy Binding Protein gene duplications in Sudan
Source: PubMed Central journal article supplement (PMC10358875; doi:10.1371/journal.pone.0287668), 2023-07-20

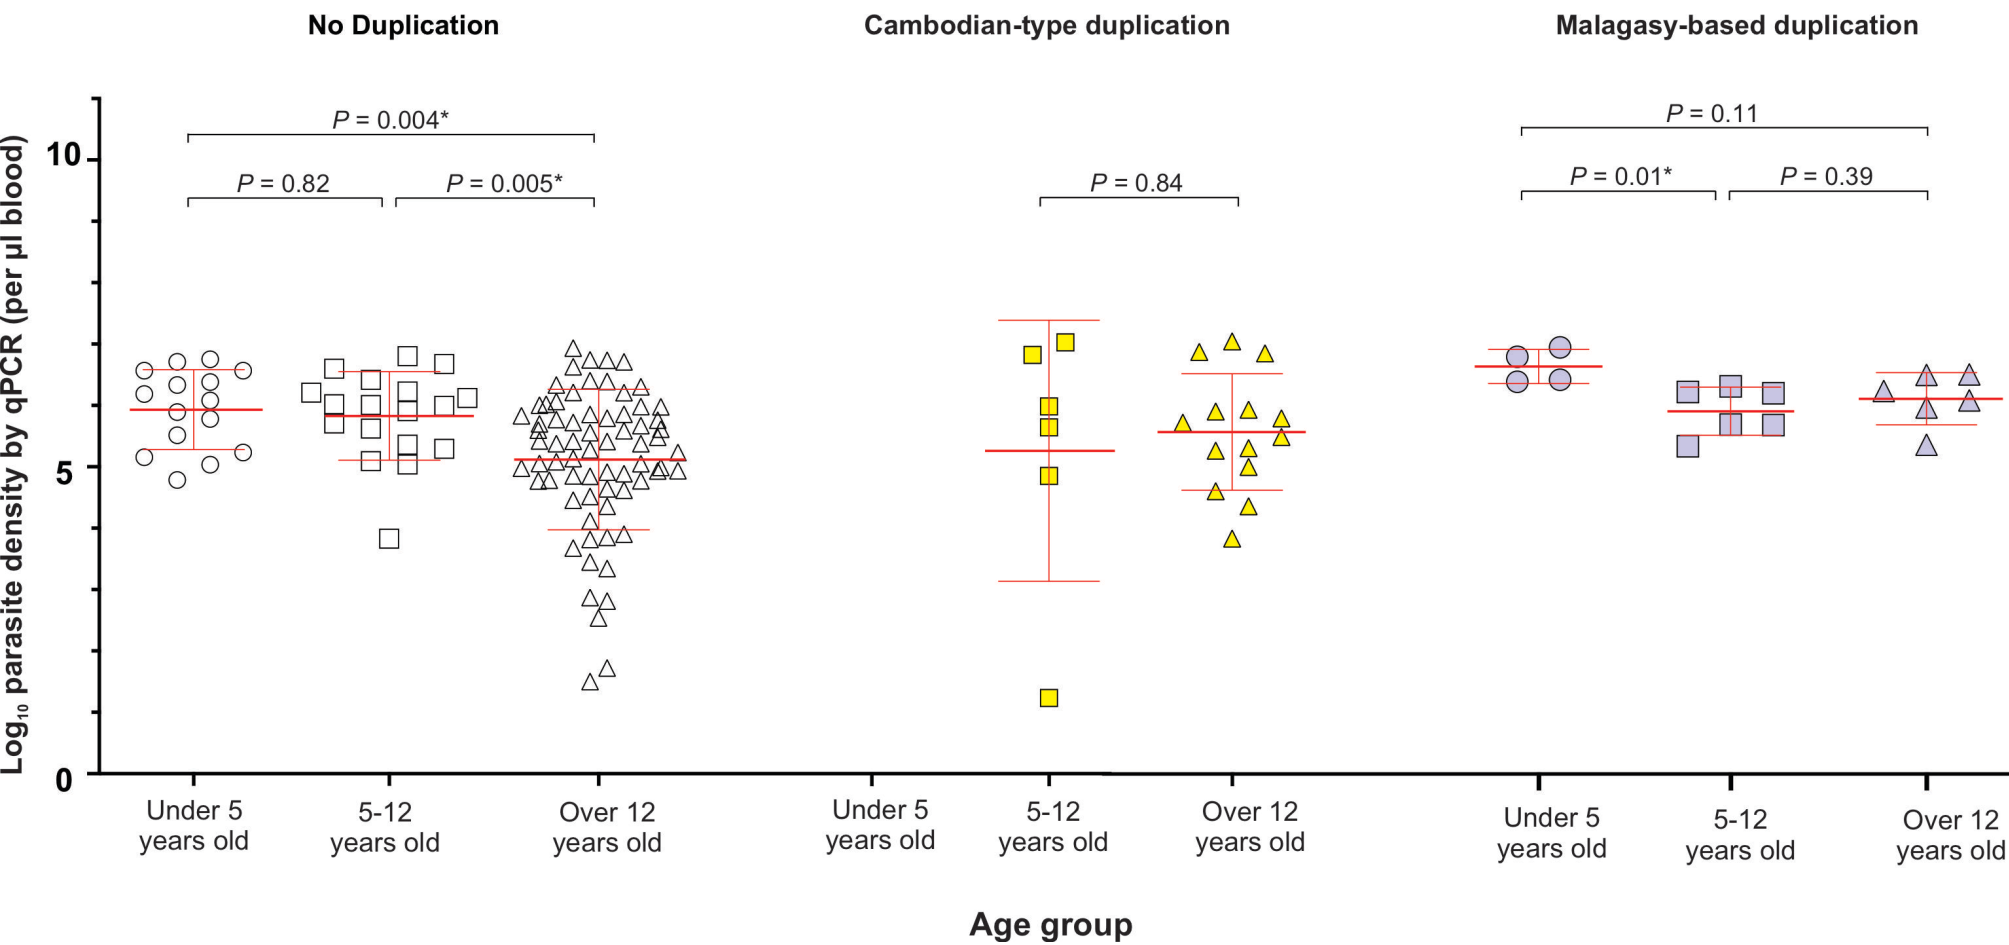

Supplement: pone.0287668.s003.pdf [file pone.0287668.s003.pdf]
